# Supplementary figures and images for: In situ decrypting plasmonic nanoparticle size-controlled phosphorylation of epidermal growth factor receptor in living cells
Source: Royal Society of Chemistry journal article supplement (doi:10.1039/d3cc02154h), 2023-01-01

Agarose gel electrophoresis date of G16NPs in Figure S3A

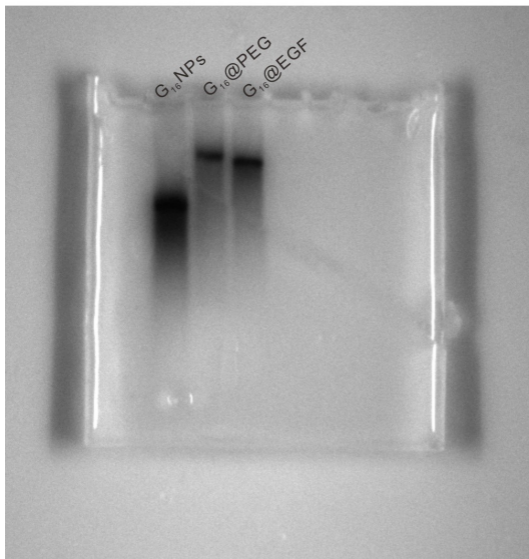

Supplement: d3cc02154h1.pdf [file d3cc02154h1.pdf]

Agarose gel electrophoresis data of G73NPs in Figure S3B

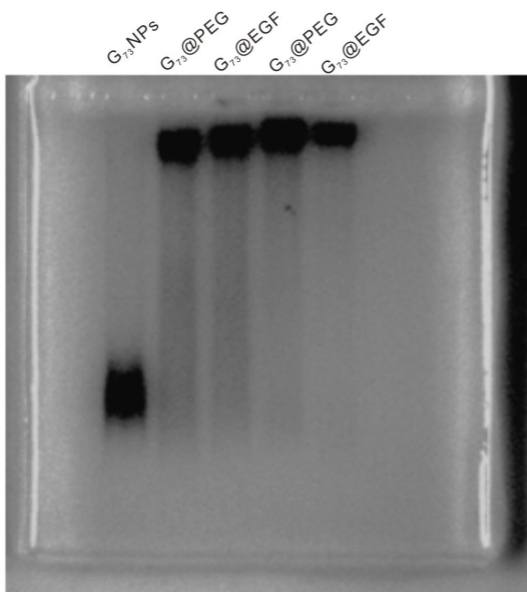

Supplement: d3cc02154h2.pdf [file d3cc02154h2.pdf]

pEGFR in Figure 4G

pEGFR(min)      0            10            30            60

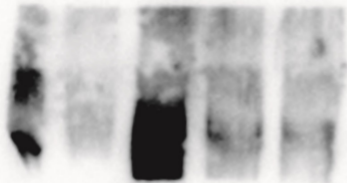

Supplement: d3cc02154h3.pdf [file d3cc02154h3.pdf]

pEGFR in Figure 4H

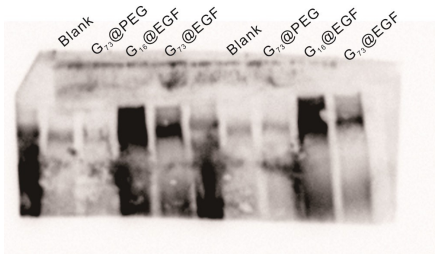

Supplement: d3cc02154h4.pdf [file d3cc02154h4.pdf]

un-pEGFR in Figure 4H

Blank

G<sub>75</sub>@PEG

G<sub>16</sub>@EGF

G<sub>73</sub>@EGF

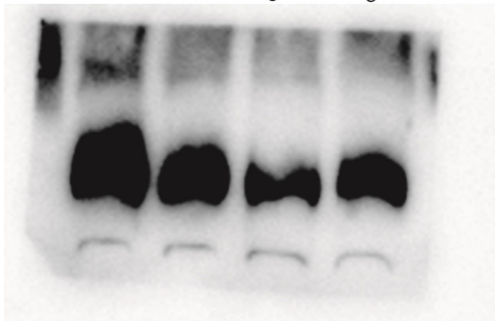

Supplement: d3cc02154h6.pdf [file d3cc02154h6.pdf]

$\beta$ -actin in Figure 4G

$\beta$ -actin(min)

0 10 30 60

0 10 30 60

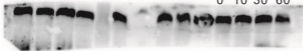

Supplement: d3cc02154h7.pdf [file d3cc02154h7.pdf]
